# Supplementary material
Source: PubMed Central journal article supplement (PMC6443492)

## SUPPLEMENT

### **Supplemental Fig. 1. Anti-Synuclein Antibodies and Bovine $\alpha$ - and $\beta$ -Synuclein**

**Sequences.** The rabbit “monoclonal” antibody (Abcam 138501) recognizes only  $\alpha$ -synuclein (the corresponding sequence in  $\beta$ -synuclein is completely different). The antibody was made against a peptide (aa 118-123 VDPDNE, in blue) in human  $\alpha$ -synuclein (identical to bovine sequence). The rabbit antibody (Abcam 15532) recognizes  $\beta$ -synuclein only (epitope near C-terminus, not depicted). The mouse monoclonal antibody (DSHB H3C) recognizes both  $\alpha$ -synuclein and  $\beta$ -synuclein. It probably sees the very C-terminal amino acids. The antibody was generated against a peptide (aa 126-140 EMPPEEEYQDYEPEA in green) in canary  $\alpha$ -synuclein (shown above bovine sequences in green). Differences in bovine  $\alpha$ - and  $\beta$ -synuclein sequences are highlighted in yellow.

**Suppl. Fig. 2.  $\alpha$ -Synuclein is variably expressed in chromaffin cells.** Immunocytochemistry was performed on non-transfected chromaffin cell cultures to identify chromogranin A-containing cells (chromaffin cells) and  $\alpha$ -synuclein (with a  $\alpha$ -synuclein-specific antibody, Abcam 138501). The paired panels **A** and **B**, **C** and **D**, and **D** and **E** are each of the same field, each containing several cells. Identical confocal microscope settings were used for the  $\alpha$ -synuclein panels. Similarly, identical confocal microscope settings were used for the chromogranin A panels. Neighboring chromaffin cells had highly variable  $\alpha$ -synuclein staining.

### **Suppl. Fig. 3. Localization of transiently expressed $\alpha$ - or $\beta$ -synuclein in chromaffin cells.**

Bovine chromaffin cells transiently expressing either unlabeled  $\alpha$ - or unlabeled  $\beta$ -synuclein together with soluble GFP to identify the transfected cells. Synuclein was identified with antibody that recognizes both  $\alpha$ - and  $\beta$ - isoforms of bovine synuclein (DSHB H3C). (A, B) Cells transiently expressing  $\alpha$ -synuclein. Neighboring non-transfected cells are outlined in white. (C, D) Cells transiently expressing  $\beta$ -synuclein. Two transfected cells in C. are separated by a green line. Neighboring non-transfected cells are outlined in white. Scale bars = 2  $\mu$ m.

## Suppl. Fig. 1 Anti-Synuclein Antibodies and Bovine $\alpha$ - and $\beta$ -Synuclein Sequences

|                     |     |                                                               |     |
|---------------------|-----|---------------------------------------------------------------|-----|
| $\alpha$ -synuclein | 1   | MDVFMKGLSKAKEGVVAAAEEKTKQGVAAEAAAGRTKEGVLYVGSKTKEGVVHGVTVAEKT | 60  |
| $\beta$ -synuclein  |     | MDVFMKGLSMMAKEGVVAAAEEKTKQGVTEAAEKTKEGVLYVGSKTKEGVVQGVASVAEKT |     |
| $\alpha$ -synuclein | 61  | EQVTNVGEAVVTGVTAVAQKTVEGAGSIAAATGFGKGDHMGKGEEGASQEGILEDMPVDP  | 120 |
| $\beta$ -synuclein  |     | EQASHLGGAVFS-----GAGNIAAATGLVKKEEFPTDLKPEEVAQEAAEEPLIE        | 109 |
| $\alpha$ -synuclein | 121 | DNEAYEMPSEEG-----YQDYEPEA                                     | 140 |
| $\beta$ -synuclein  | 110 | PLMEPEGESYEEQPQEEYQEYEPEA                                     | 134 |

### differences in $\alpha$ - and $\beta$ -synuclein sequences

rabbit 'mab' Abcam 138501

mouse mab DSHB H3C

rabbit Abcam 15532 (not depicted)

Chromogranin A

$\alpha$ -synuclein

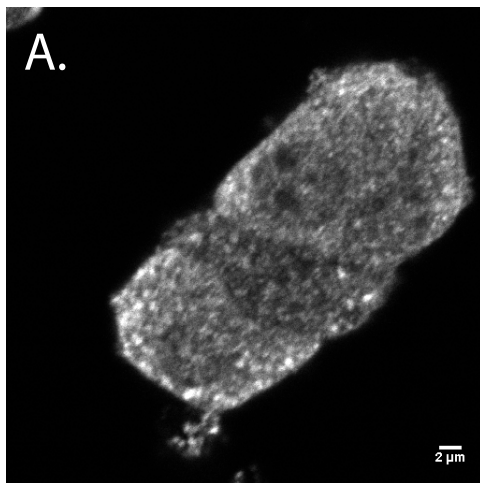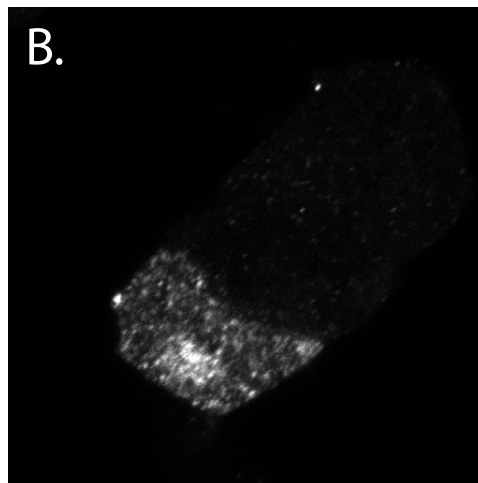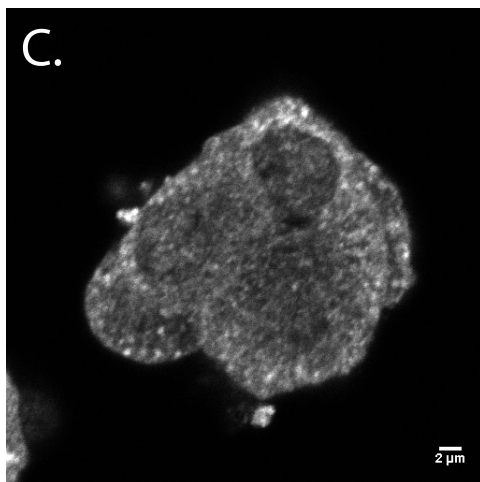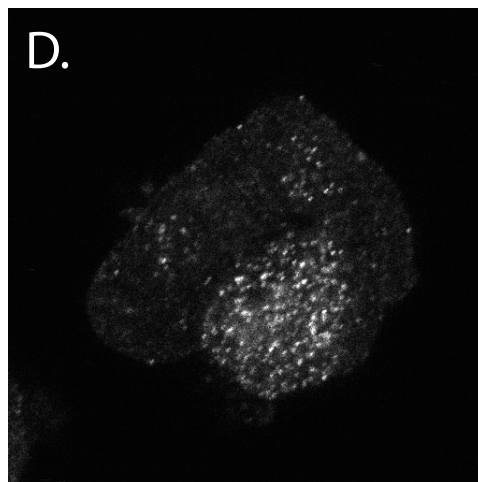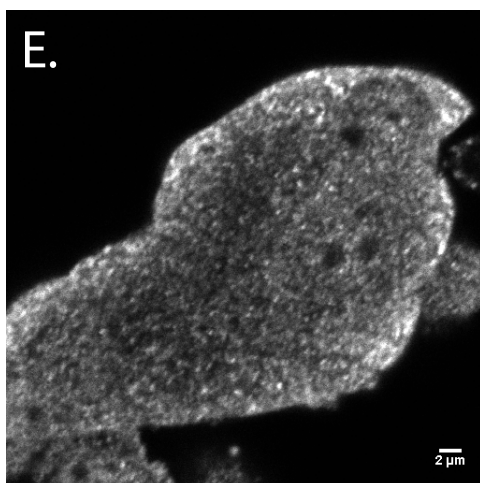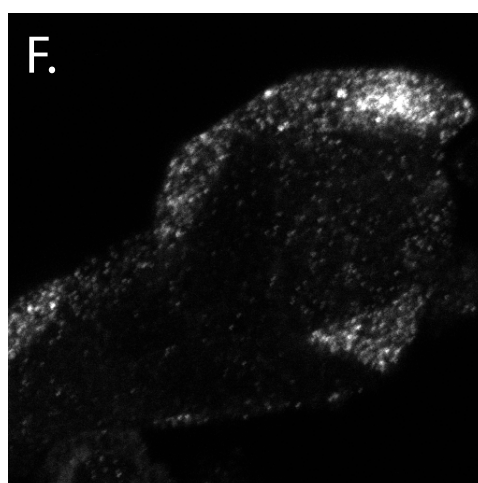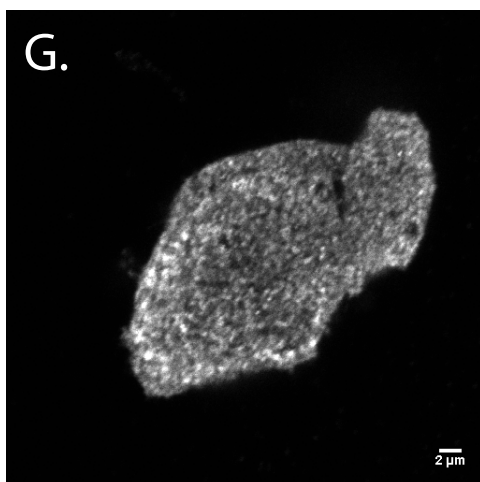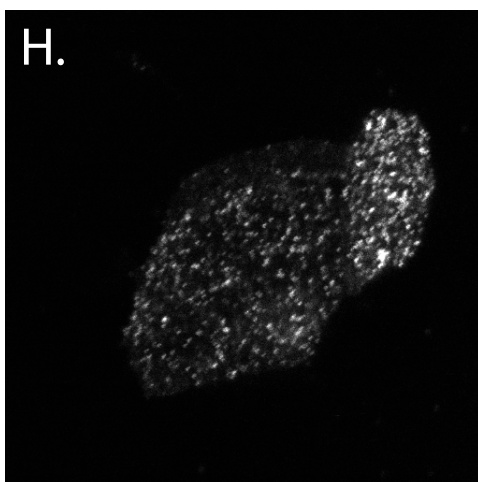

Suppl. Fig. 3

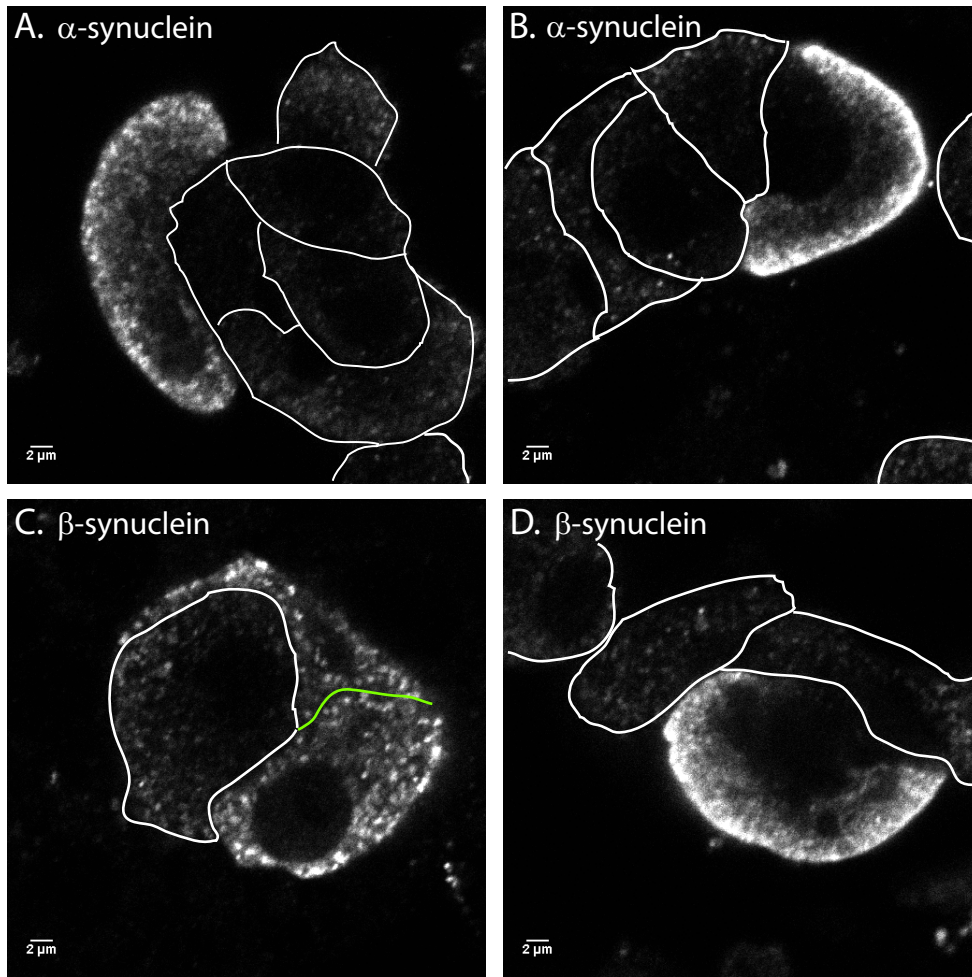

Supplement: NIHMS1521258-supplement-1.pdf [file NIHMS1521258-supplement-1.pdf]
